# Supplementary material for: Hyperphosphatemia and Sudden Death in Hemodialysis Patients: A Silent Threat in Kidney Disease.
Source: Research Square preprint supplement (doi:10.21203/rs.3.rs-6907464/v1), 2025-06-19
Supplement: Supplementary file 1 [file 55ca355ae369c3012800cc46.docx]

| Variables | Total patients  (n= 175) | Group 1 (<6.5),  n =98 | Group 2(>6.5) n=77 | p-value |
| --- | --- | --- | --- | --- |
| Age (Years), mean ± SD | 44.23±14.87 | 44.52±15.03 | 43.87±14.74 | 0.77 |
| Gender, n (%)  Male  Female | 93 (53.1))  82(46.9) | 47 (47.95)  51(52) | 46 (59.7)  31(40.25) | 0.12 |
| Comorbidities, n (%)  Hypertension  DM  CVD | 100(57.1)  42(24)  45(25.7) | 55(56.1)  25(25.5)  25(25.5) | 45(58.44)  17(22.07)  20(25.97) | 0.75  0.59  0.94 |
| Duration of maintenance hemodialysis (months), mean ± SD | 13.35± 11.86 | 12.97± 12.50 | 13.82± 11.06 | 0.64 |
| Hemodialysis session length (≥6 h) (%) | 111 (63.4) | 63(64.2) | 49(63.6) | 0.44 |
| Hemoglobin( g/dL),mean ± SD | 7.46± 1.36 | 7.48± 1.21 | 7.44± 1.54 | 0.82 |
| Serum albumin (g/dl), mean ± SD | 3.61± 0.55 | 3.57± 0.60 | 3.66± 0.49 | 0.28 |
| Serum Creatinine (mg/dl), mean ± SD | 7.86±2.04 | 7.61±1.90 | 8.18± 2.17 | 0.06 |
| Corrected serum Ca (mg/dL), mean ± SD | 8.51± 0.76 | 8.54± 0.75 | 8.48± 0.77 | 0.59 |
| Serum alkaline phosphatase( IU/L),mean ± SD | 481.20± 204.70 | 438.69± 198.45 | 535.30± 200.93 | 0.002 |

**Table 1 Baseline characteristics of patients with ESKD stratified by serum phosphorous levels**

**ESKD, end-stage kidney disease; SD, standard deviation; DM, diabetes mellitus; CVD, cardiovascular disease**
